# Supplementary material for: The biogeography of relative abundance of soil fungi versus bacteria in surface topsoil
Source: Copernicus journal article supplement (doi:10.5194/essd-14-4339-2022), 2022-09-22
Supplement: Supplementary file 1 [file essd-14-4339-2022-supplement.pdf]

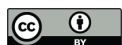

## *Supplement of*

# **The biogeography of relative abundance of soil fungi versus bacteria in surface topsoil**

**Kailiang Yu et al.**

*Correspondence to:* Kailiang Yu ([kai86liang@gmail.com](mailto:kai86liang@gmail.com)) and Thomas W. Crowther ([tom.crowther@usys.ethz.ch](mailto:tom.crowther@usys.ethz.ch))

The copyright of individual parts of the supplement might differ from the article licence.

## 1    **Classification of vegetation biomes and vegetation types**

2    Following the approach by Olson et al. 2006, vegetation biomes where the soil samples were  
3    collected were classified into tundra, boreal forests, montane grasslands, temperate conifer  
4    forests, temperate grasslands, temperate broadleaf forests, tropical forests, and Mediterranean  
5    & deserts. Mediterranean and deserts had low sample sizes and thus were combined into one  
6    vegetation biome. To determine the vegetation types in locations where the soil samples were  
7    collected, we used the Global 1-km Consensus Land Cover map<sup>2</sup>. The land cover map  
8    classifies vegetation or land cover types into Evergreen/Deciduous Needleleaf Trees,  
9    Evergreen Broadleaf Trees, Deciduous Broadleaf Trees, Mixed/Other Trees, Shrubs,  
10    Herbaceous Vegetation, Cultivated and Managed Vegetation, Regularly Flooded Vegetation,  
11    Urban/Built-up, Snow/Ice, Barren, and Open Water. We summed up the vegetation types of  
12    Evergreen/Deciduous Needleleaf Trees, Evergreen Broadleaf Trees, Deciduous Broadleaf  
13    Trees, Mixed/Other Trees and Shrubs to derive the total woody plant cover. To represent  
14    human activities (or land usage change), we used land cover of Cultivated and Managed  
15    Vegetation to derive the managed cover. Total vegetation cover is the sum of woody,  
16    herbaceous and managed vegetation cover. Then we classified our soil sample locations into  
17    vegetation types or ecosystems dominated by woody vegetation, managed vegetation, and  
18    herbaceous vegetation. To this end, we tested various thresholds of vegetation cover values  
19    and chose the one without overlaps among different vegetation types. That is, if the total  
20    vegetation cover was less than 20% or the cover of barren soil was greater than 50%, it was  
21    classified as barren soil. If the woody vegetation cover was larger than 20% and larger than  
22    the managed vegetation cover, it was classified into the vegetation type or ecosystem  
23    dominated by woody vegetation. If the managed vegetation cover was larger than 20% and  
24    larger than the woody vegetation cover, it was classified into the vegetation type or ecosystem

dominated by managed vegetation. The rest of sample sites were classified into herbaceous vegetation dominated ecosystem, if herbaceous vegetation cover was larger than 20%.

## **Environmental drivers**

Based on previous studies<sup>3-5</sup>, variables or covariates of climate, soil and human activities which likely affect F:B ratio or fungal proportion were selected for this study. They include climate conditions (aridity index, mean annual precipitation-MAP, mean annual temperature-MAT), soil properties (clay, silt and sand content, soil organic carbon-SOC, soil C:N ratio, pH, cation exchange capacity), vegetation index (net primary productivity-NPP, woody vegetation cover, herbaceous vegetation cover), and human activities (managed vegetation cover). All of these variables were derived from the global layers based on georeferenced coordinates of aggregated soil sample at 30 arc-seconds resolution. Machine-learning algorithm Random Forest was then used to determine variable importance for these 12 variable (Breiman 2001). We ran 1000 simulations of machine-learning algorithm random forest and reported mean values of mean decrease in accuracy (%IncMSE) and mean decrease gini (IncNodePurity) with 95% confidence interval. The greater the values of %IncMSE and IncNodePurity are, the more important the variables are.

## **Machine learning**

Fungal proportion has the largest sample size ( $n = 3224$  samples) and is the focus of our study. Because of better predictive strength, we used machine learning (random forest) to generate a spatially explicit map of fungal proportion at a global scale. The distinct soil samples ( $n = 3224$ ) falling within the same 30 arc-seconds ( $\sim 1\text{-km}^2$ ) pixel were aggregated as an average, thus resulting in a total of 946 unique pixels across global as inputs into the geospatial modelling.

To generate a quantitative and mechanistic understanding of environmental controls on fungal proportion across landscapes, we used a stack of ecologically relevant, global map

layers including climatic, soil nutrient, soil chemical, soil physical, vegetative indices, radiation and topographic variables and anthropogenic covariates (Supplementary Table 1). All of these covariate map layers were standardized at 30 arc-seconds resolution ( $\approx 1\text{km}$  at the equator). When these global layers' resolution is higher than 30 arc-seconds, we downsampled these layers using a mean aggregation method. In contrast, if layers have a lower original resolution, we resampled these layers using simple upsampling (i.e., without interpolation) to align with the higher resolution grid. Each sample (plot)-specific independent variables were then derived from these ecologically relevant, global map layers based on each sample' georeferenced location.

The soil samples used for measuring soil microbes were collected from top soil surface (0-10/15 cm). To approximate the sampling soil depth, we thus used the soil variable at soil depth of 15 cm, thus resulting in a total of 90 ecologically relevant, global map layers. Geospatial modelling was used to investigate the dependence of fungal proportion on the 90 covariates. We followed recent advancements in machine learning for spatial prediction<sup>6</sup>, and used random forest with a variety of parameters (i.e., variablesPerSplit 2, 3, 4, 5, 8, 10) to train the models and assessed each model using k-fold cross validation (with  $k = 10$ ). This allowed us to quantify the coefficient of determination values for each fold of data in each model. Then we determined the mean and standard deviation values for the cross validated models. The model with the highest coefficient of determination values and lowest standard deviation were selected as the best model. The results showed that the final (best) model had a remarkably high strength of prediction (mean cross-validation  $R^2 = 0.43$ , standard deviation = 0.09). The “best model” with the highest coefficient of determination values and lowest standard deviation were then used to spatially explain the fungal proportion at a global scale, with the derived 90 covariates on all the soil samples ( $n = 946$ ). The results showed again that the best performing model had remarkably high predictive strength at a global scale



(overall  $R^2 = 0.90$ ).

To account for the potential role of land usage change, we used the subset of data including only natural ecosystems ( $n = 1795$ ) and aggregated the samples at 30 arc-seconds ( $\sim 1\text{-km}^2$ ) resolution as an average. We then used machine learning (random forest) to generate a spatially explicit map of fungal proportion at a global scale, using the derived 90 covariates on all the soil samples ( $n = 716$ ) (Fig. S1). The predictive strength of using data of natural ecosystems was lower than the case of using full dataset. But it still had good predictive strength with mean cross-validation  $R^2 = 0.35$  and a final best model  $R^2 = 0.91$  (Fig. S9). In view of the minimal difference of the two scenarios, the main text reported results from the full dataset, whereas results from only the natural ecosystems was reported in the supplementary materials.

98   **References**

- 99    1.    Olson, D. M. *et al.* Terrestrial Ecoregions of the World: A New Map of Life on Earth.  
100       *Bioscience* **51**, 933 (2006).
- 101   2.    Tuanmu, M. N. & Jetz, W. A global 1-km consensus land-cover product for  
102       biodiversity and ecosystem modelling. *Glob. Ecol. Biogeogr.* **23**, 1031–1045 (2014).
- 103   3.    de Vries, F. T. *et al.* Abiotic drivers and plant traits explain landscape-scale patterns in  
104       soil microbial communities. *Ecol. Lett.* **15**, 1230–1239 (2012).
- 105   4.    Chen, Y. L. *et al.* Patterns and drivers of soil microbial communities in Tibetan alpine  
106       and global terrestrial ecosystems. *J. Biogeogr.* **43**, 2027–2039 (2016).
- 107   5.    Drenovsky, R. E., Steenwerth, K. L., Jackson, L. E. & Scow, K. M. Land use and  
108       climatic factors structure regional patterns in soil microbial communities. *Glob. Ecol.*  
109       *Biogeogr.* **19**, 27–39 (2010).
- 110   6.    Hengl, T., Nussbaum, M., Wright, M. N., Heuvelink, G. B. M. & Gräler, B. Random  
111       forest as a generic framework for predictive modeling of spatial and spatio-temporal  
112       variables. *PeerJ* **6**, e5518 (2018).

113

114

115

116

117

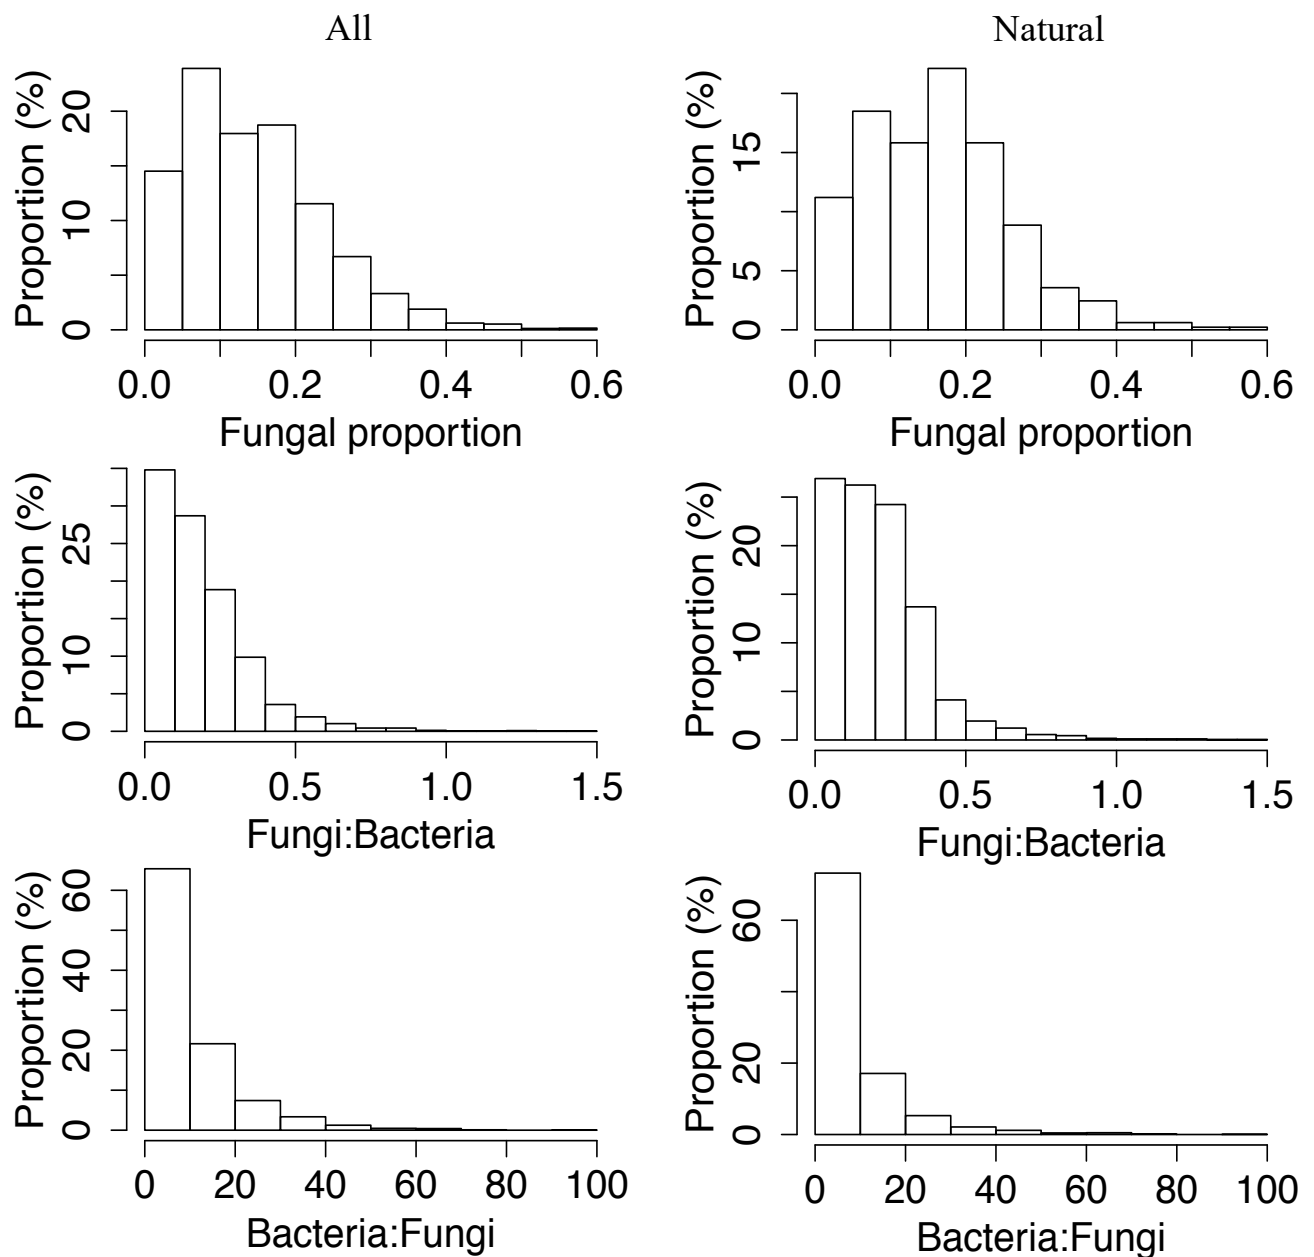

**Fig. S1 Frequency distribution (%) of proportion of fungi, fungal and bacterial ratio and bacterial and fungal ratio.** The data is derived from the original distinct soil samples ( $n = 3224$  for all data and  $n = 1795$  for natural ecosystems) before aggregation.

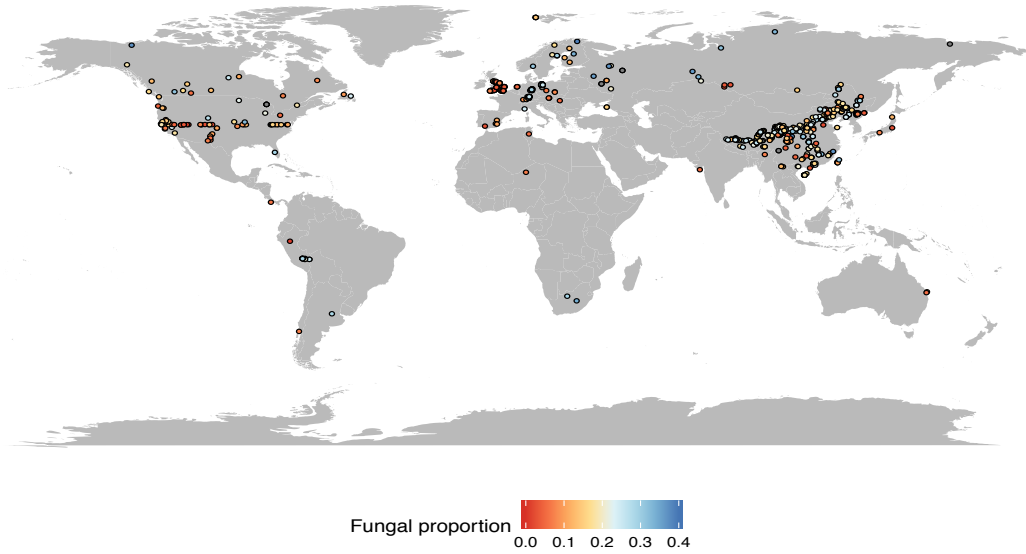

**Fig. S2 Map of sample locations for fungal proportion using natural ecosystems.** All data points (n = 1795) falling within the same 30 arc-seconds ( $\sim 1\text{-km}^2$ ) pixel were aggregated via an average (n = 716).

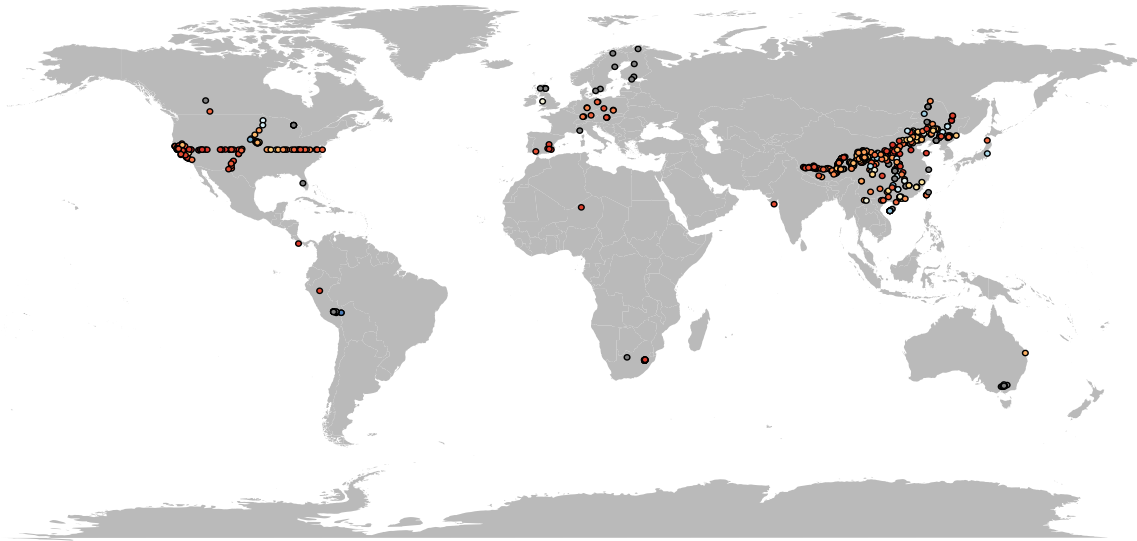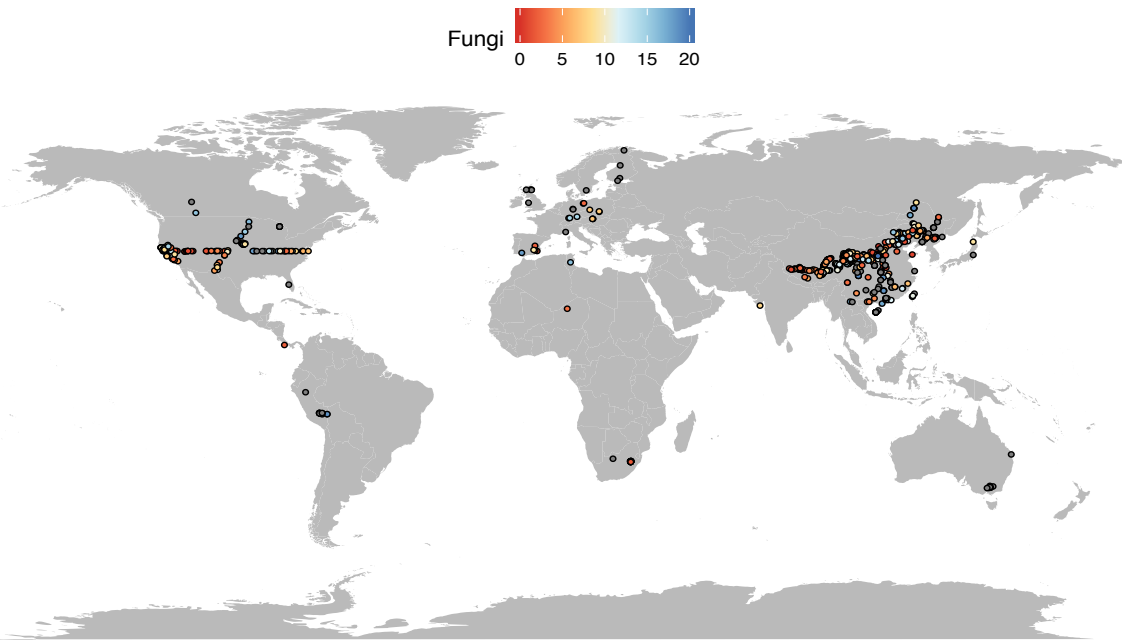

**Fig. S3 Map of sample locations for abundance of fungi and bacteria.** All data points ( $n = 2753$  for fungi and  $n = 2759$  for bacteria) falling within the same 30 arc-seconds ( $\sim 1\text{-km}^2$ ) pixel were aggregated via an average ( $n = 646$  and  $n = 647$  for both fungi and bacteria, respectively).

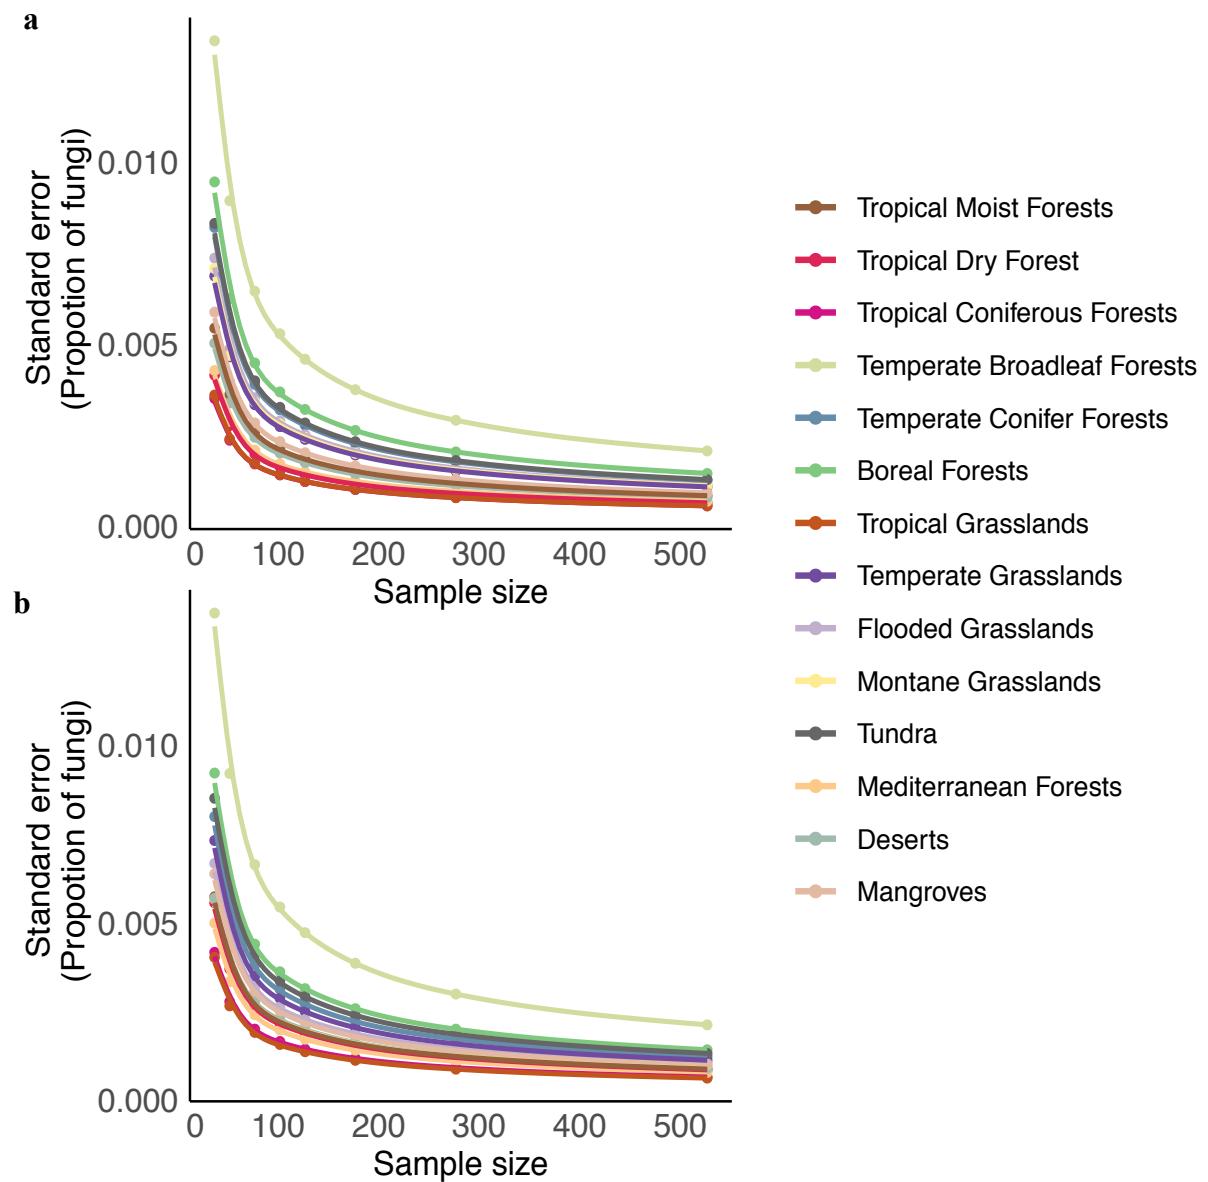

**Fig. S4** The standard error of the predicted mean values of fungal proportion decrease with increasing sample size, quantified by the 1000 bootstrapping. a, the scenario of using full dataset. b, the scenario of using dataset with natural ecosystems.

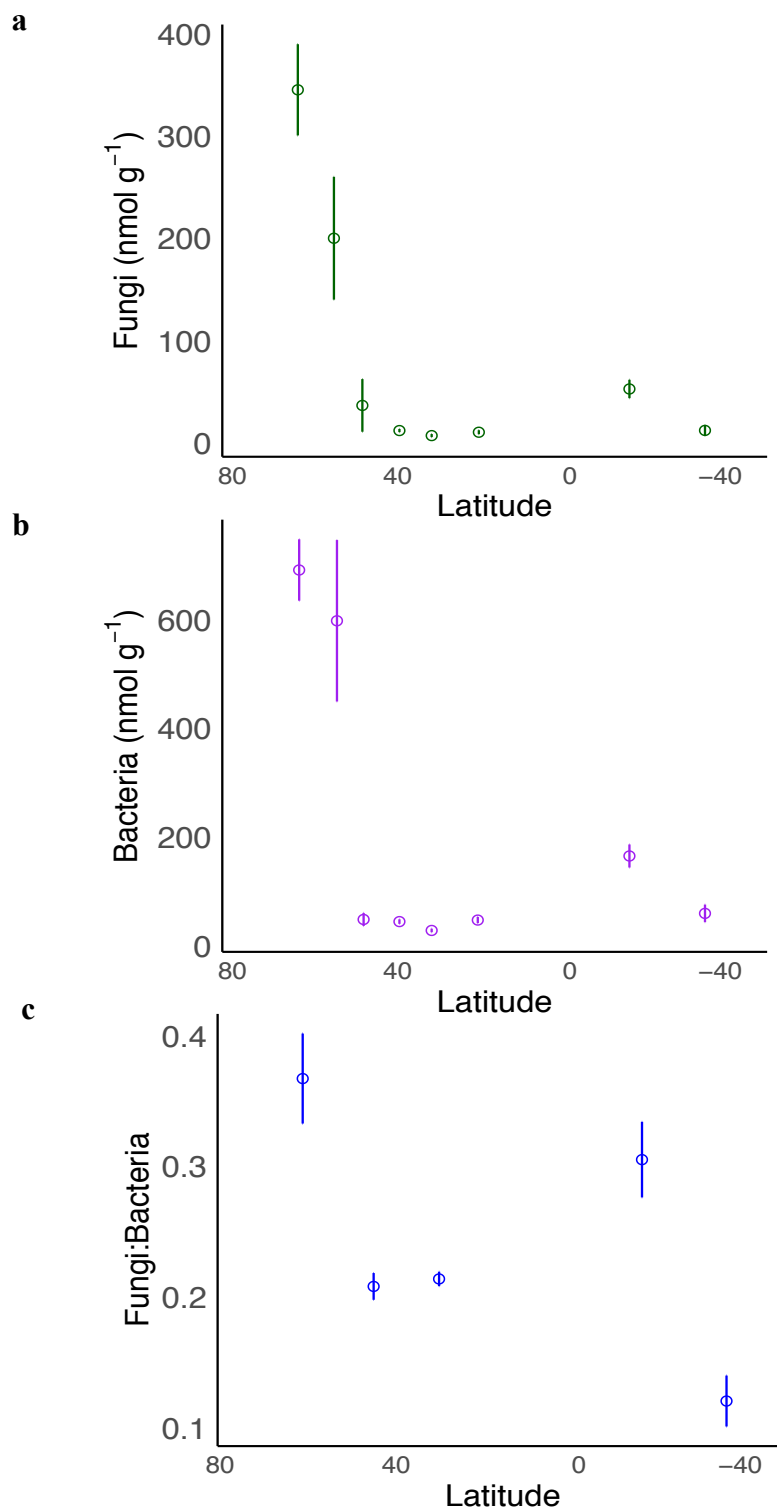

**Fig. S5 Abundance of fungi (a), bacteria (b), and fungi and bacteria ratio (c) derived from PLFA as affected by latitude.**

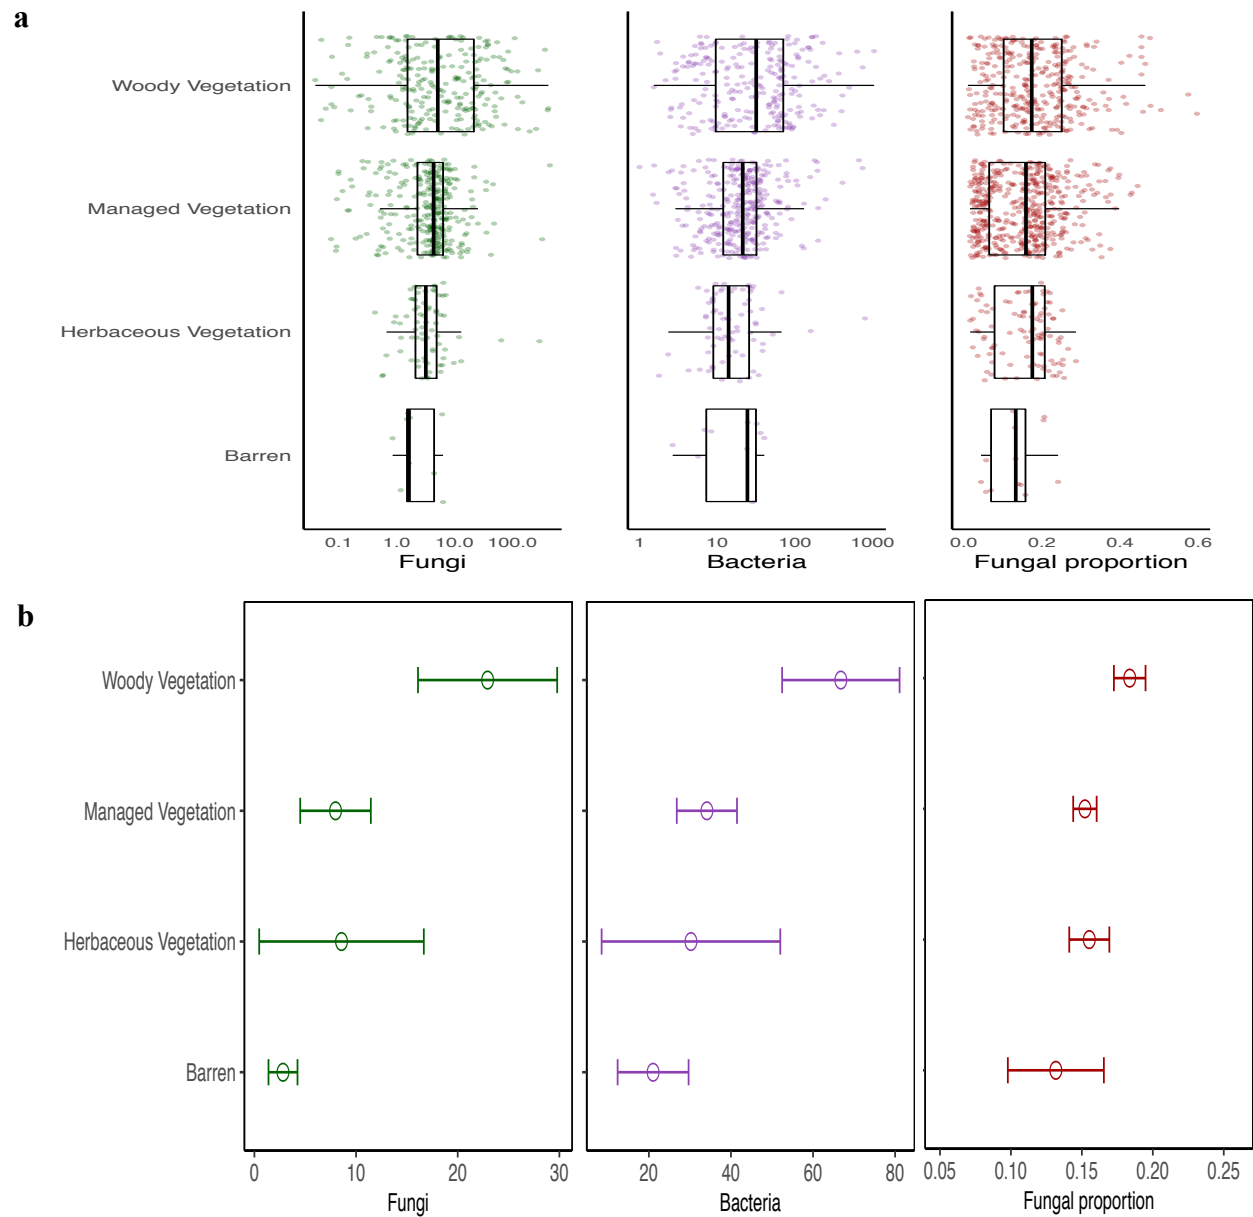

**Fig. S6 The median and interquartile range (a) and mean  $\pm$  95 CIs (b) of abundance of fungi and bacteria and fungal proportion across vegetation types. Mediterranean and desert have low sample sizes ( $<25$ ) and thus were combined.**



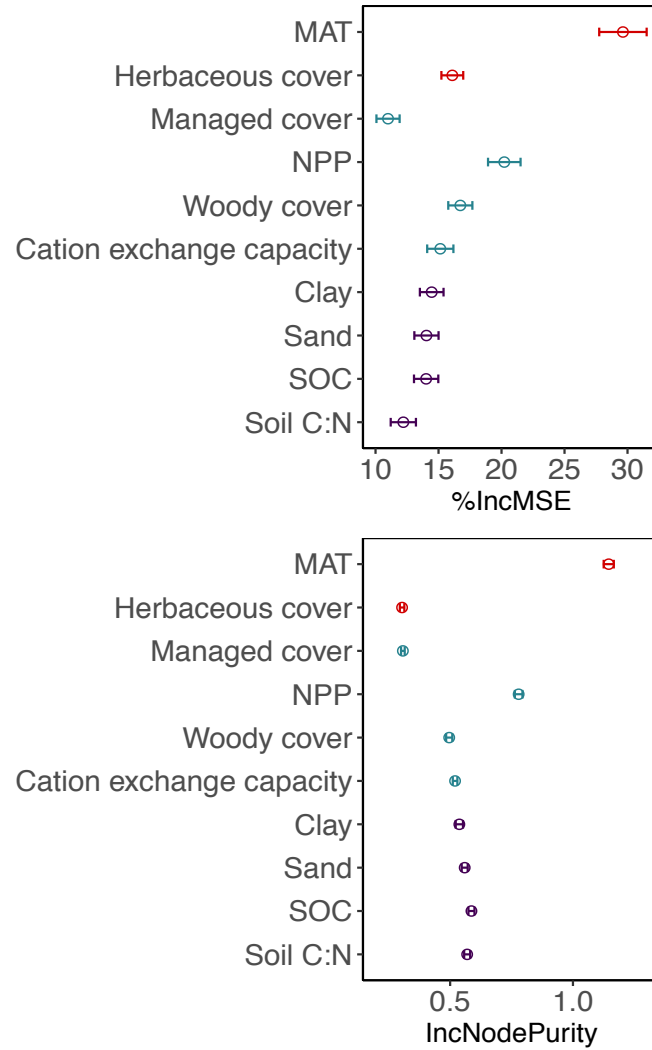

**Fig. S7 Mean decrease in accuracy (%IncMSE, mean and SD) and mean decrease gini (IncNodePurity, mean and SD) estimated from 1000 simulations of random forests. This is used to evaluate the importance of top environmental drivers on proportion of fungi derived from natural ecosystems.**

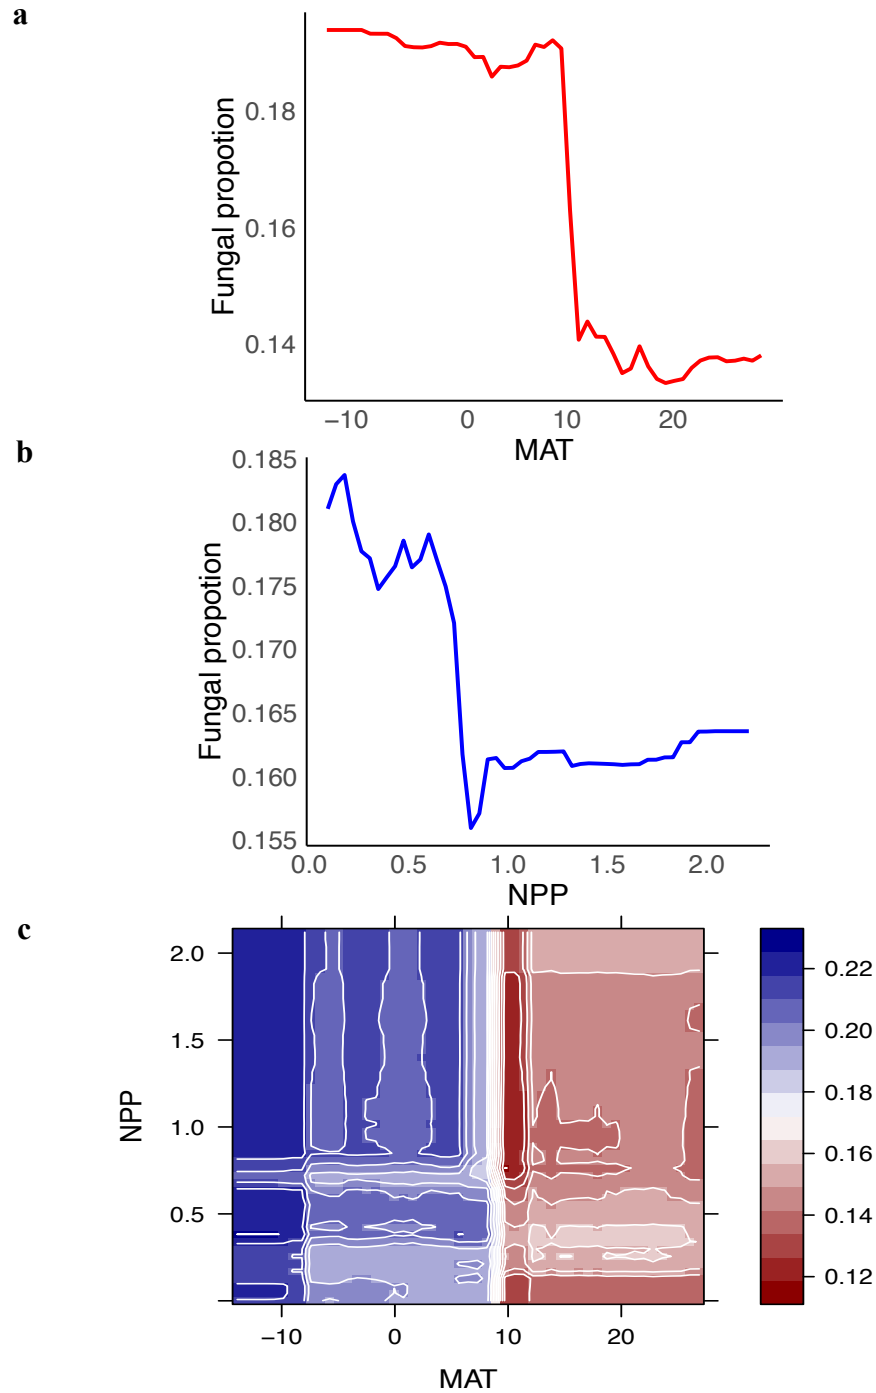

**Fig. S8 Fungal proportion is primarily associated with net primary productivity and climate using data set of natural ecosystems. a–b, Partial feature contributions of primary environmental variables (a, MAT; b, NPP) to proportion of fungi. c, Partial feature contributions of primary environmental variable interactions (MAT vs NPP) to proportion of fungi.**

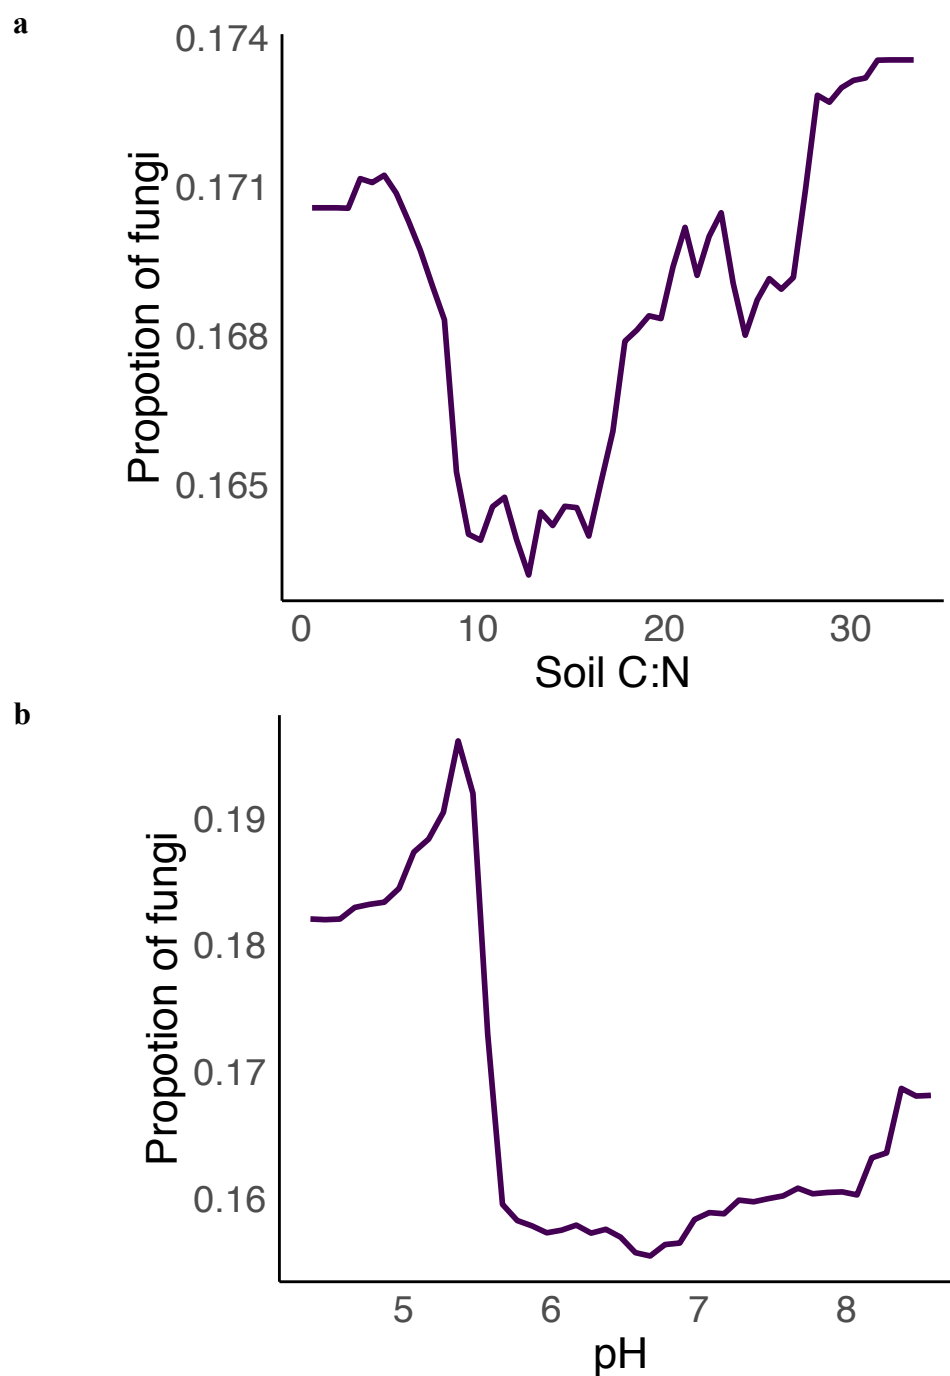

**Fig. S9 Partial feature contributions of soil C:N (a) and pH (b) to fungal proportion.**

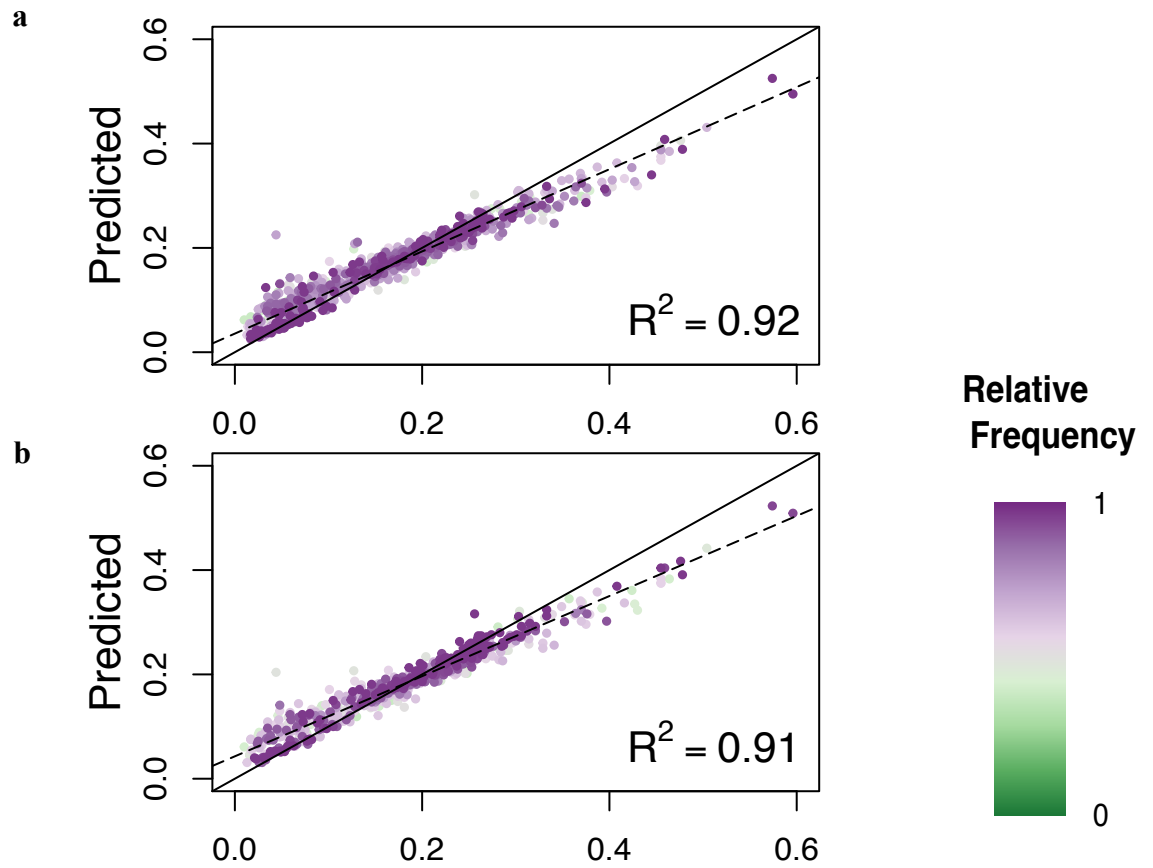

**Fig. S10 Model and data validation in the final model.** a, the scenario of using full dataset for fungal proportion; b, the scenario of using dataset from natural ecosystems for fungal proportion; C. Heat plots showing the relationships between predicted versus observed values of fungal proportion for the best final models. Dashed diagonal lines indicate fitted relationships, while solid diagonal lines indicate a 1:1 relationship between predicted and observed points.

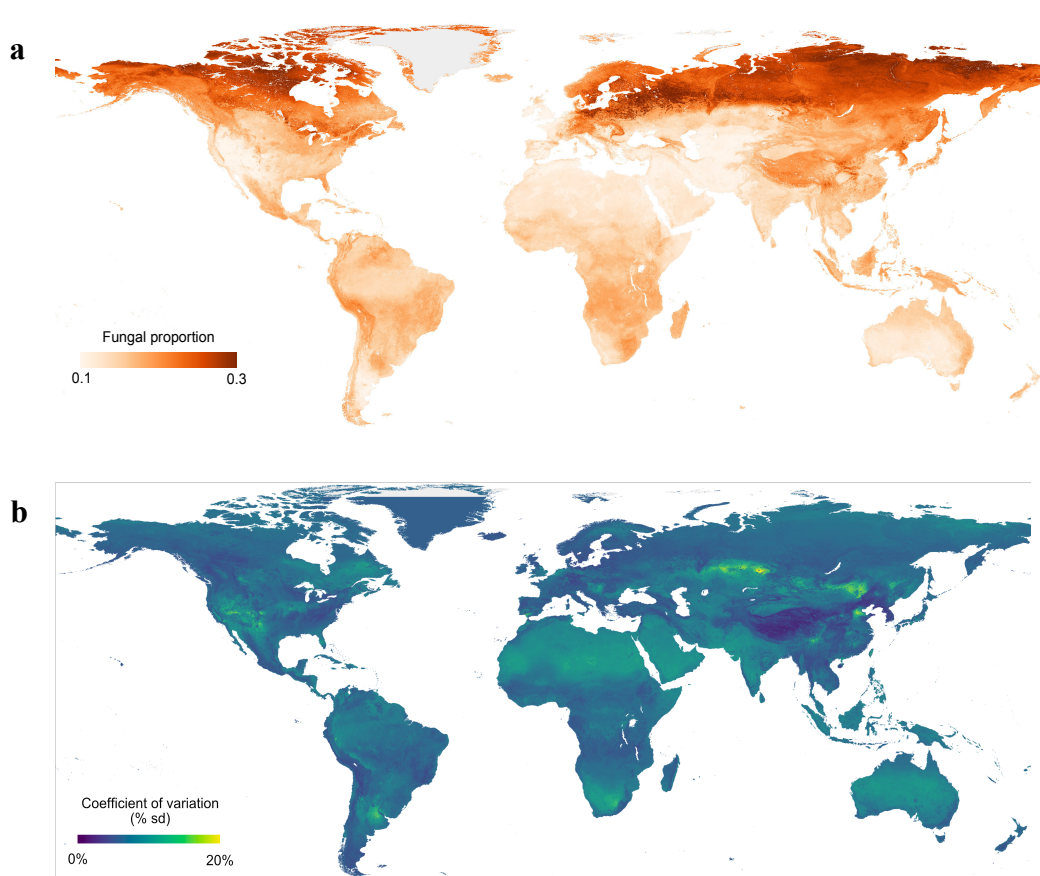

**Fig. S11 Global map of fungal proportion (a) and bootstrapped (100 iterations) coefficient of variation (b) at the 30 arcsec (approximately 1 km) pixel scale using the data with natural ecosystems.** Bootstrapped coefficient of variation is standard deviation divided by the mean predicted value as a measure of prediction accuracy. Sampling was stratified by biome.

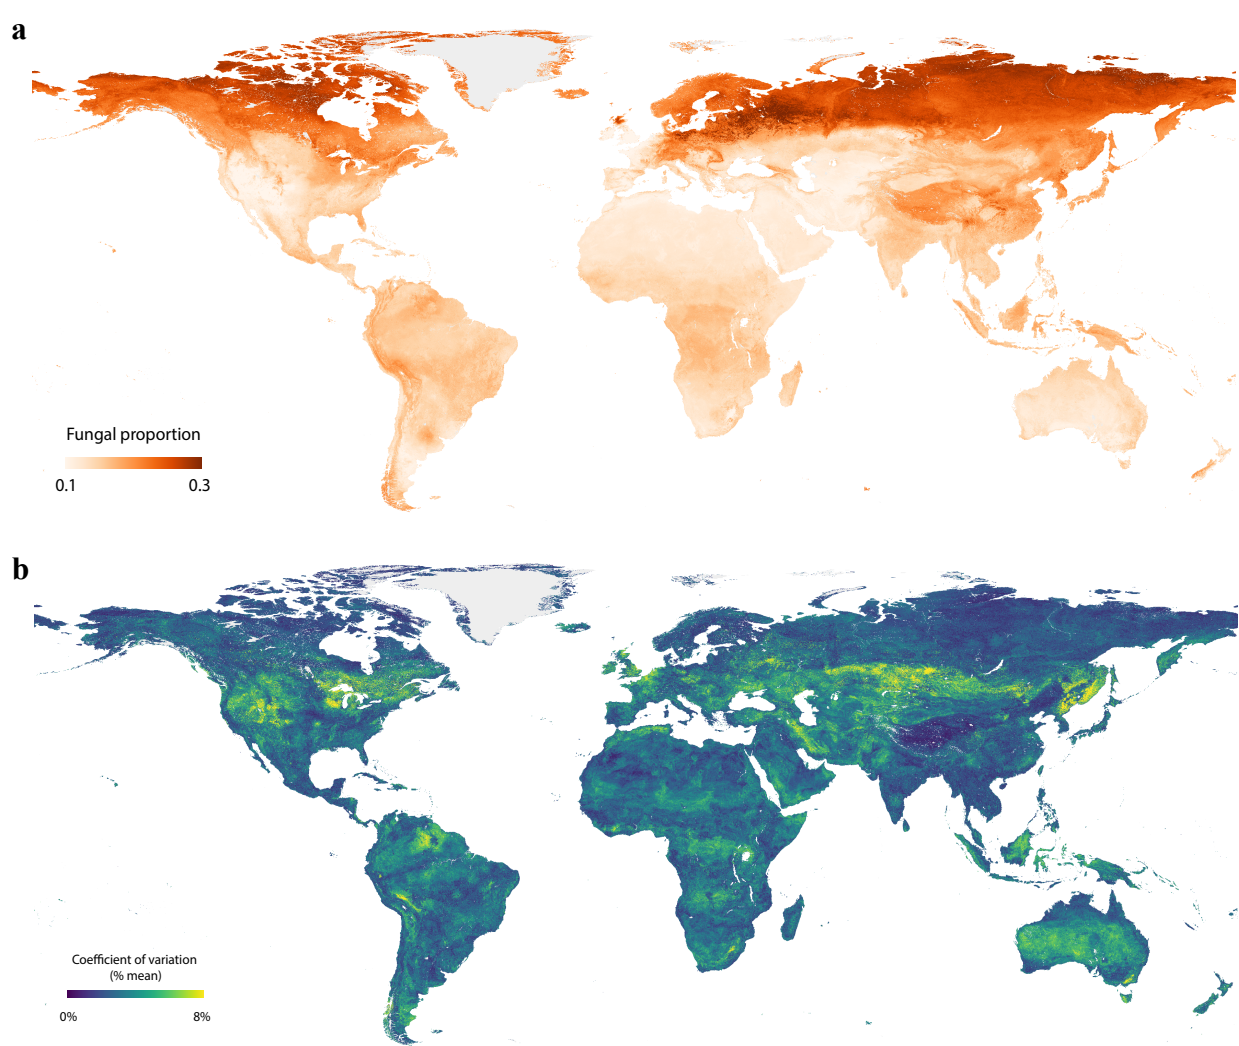

**Fig. S12 Global map of fungal proportion (a) and bootstrapped (100 iterations) coefficient of variation (b) at the 30 arcsec (approximately 1 km) pixel scale using full data.** Bootstrapped coefficient of variation is standard deviation divided by the mean predicted value as a measure of prediction accuracy. Samples were selected by randomly sampling 90% full datasets with replacement to account for the unbalanced sample distribution.

448    Supplementary references for PLFA

- 449    1.    Schneckner, J. *et al.* Effects of soil organic matter properties and microbial community  
450       composition on enzyme activities in cryoturbated arctic soils. *PLoS One* (2014).  
451       doi:10.1371/journal.pone.0094076
- 452    2.    Birkhofer, K. *et al.* General relationships between abiotic soil properties and soil biota  
453       across spatial scales and different land-use types. *PLoS One* (2012).  
454       doi:10.1371/journal.pone.0043292
- 455    3.    Niu, J., Zhou, X., Jiang, N. & Wang, Y. Characteristics of soil microbial communities  
456       under dry and wet condition in Zoige alpine wetland. *Shengtai Xuebao/ Acta Ecol. Sin.*  
457       (2011).
- 458    4.    de Vries, F. T. *et al.* Abiotic drivers and plant traits explain landscape-scale patterns in  
459       soil microbial communities. *Ecol. Lett.* **15**, 1230–1239 (2012).
- 460    5.    Drenovsky, R. E., Steenwerth, K. L., Jackson, L. E. & Scow, K. M. Land use and  
461       climatic factors structure regional patterns in soil microbial communities. *Glob. Ecol.*  
462       *Biogeogr.* **19**, 27–39 (2010).
- 463    6.    Bardgett, R. D., Lovell, R. D., Hobbs, P. J. & Jarvis, S. C. Seasonal changes in soil  
464       microbial communities along a fertility gradient of temperate grasslands. *Soil Biol.*  
465       *Biochem.* (1999). doi:10.1016/S0038-0717(99)00016-4
- 466    7.    Boot, C. M., Hall, E. K., Denef, K. & Baron, J. S. Long-term reactive nitrogen loading  
467       alters soil carbon and microbial community properties in a subalpine forest ecosystem.  
468       *Soil Biol. Biochem.* (2016). doi:10.1016/j.soilbio.2015.10.002
- 469    8.    Boyle, S. A., Yarwood, R. R., Bottomley, P. J. & Myrold, D. D. Bacterial and fungal  
470       contributions to soil nitrogen cycling under Douglas fir and red alder at two sites in  
471       Oregon. *Soil Biol. Biochem.* (2008). doi:10.1016/j.soilbio.2007.09.007
- 472    9.    Brant, J. B., Myrold, D. D. & Sulzman, E. W. Root controls on soil microbial

community structure in forest soils. *Oecologia* (2006). doi:10.1007/s00442-006-0402-7

10. Chang, E. H. & Chiu, C. Y. Changes in soil microbial community structure and activity in a cedar plantation invaded by moso bamboo. *Appl. Soil Ecol.* (2015).

doi:10.1016/j.apsoil.2015.02.001

11. Chang, E. H., Tian, G. & Chiu, C. Y. The effect of re-planting trees on soil microbial communities in a wildfire-induced subalpine grassland. *Forests* (2017).

doi:10.3390/f8100385

12. Chang, E. H., Chen, C. P., Tian, G. & Chiu, C. Y. Replacement of natural hardwood forest with planted bamboo and cedar in a humid subtropical mountain affects soil microbial community. *Appl. Soil Ecol.* (2018). doi:10.1016/j.apsoil.2017.11.006

13. Cui, H. jun *et al.* Soil microbial community composition and its driving factors in alpine grasslands along a mountain elevational gradient. *J. Mt. Sci.* (2016).

doi:10.1007/s11629-015-3614-7

14. Dong, W. Y. *et al.* Responses of soil microbial communities and enzyme activities to nitrogen and phosphorus additions in Chinese fir plantations of subtropical China.

*Biogeosciences* (2015). doi:10.5194/bg-12-5537-2015

15. He, R. *et al.* Effects of forest conversion on soil microbial communities depend on soil layer on the eastern Tibetan Plateau of China. *PLoS One* (2017).

doi:10.1371/journal.pone.0186053

16. Guo, J. *et al.* Conversion of a natural evergreen broadleaved forest into coniferous plantations in a subtropical area: effects on composition of soil microbial communities and soil respiration. *Biol. Fertil. Soils* (2016). doi:10.1007/s00374-016-1120-x

17. Herold, N. *et al.* Soil property and management effects on grassland microbial communities across a latitudinal gradient in Germany. *Appl. Soil Ecol.* (2014).

doi:10.1016/j.apsoil.2013.07.009



- 498 18. Hsiao, C. J., Sassenrath, G. F., Zeglin, L. H., Hettiarachchi, G. M. & Rice, C. W.  
 499 Vertical changes of soil microbial properties in claypan soils. *Soil Biol. Biochem.*  
 500 (2018). doi:10.1016/j.soilbio.2018.03.012
- 501 19. Huang, Y. M., Michel, K., An, S. shan & Zechmeister-Boltenstern, S. Changes in  
 502 microbial-community structure with depth and time in a chronosequence of restored  
 503 grassland soils on the Loess Plateau in northwest China. *J. Plant Nutr. Soil Sci.* (2011).  
 504 doi:10.1002/jpln.201000397
- 505 20. KUMAR, C. M. & GHOSHAL, N. Impact of Land-Use Change on Soil Microbial  
 506 Community Composition and Organic Carbon Content in the Dry Tropics. *Pedosphere*  
 507 (2017). doi:10.1016/S1002-0160(17)60404-1
- 508 21. Labidi, S., Nasr, H., Zouaghi, M. & Wallander, H. Effects of compost addition on  
 509 extra-radical growth of arbuscular mycorrhizal fungi in *Acacia tortilis* ssp. *raddiana*  
 510 savanna in a pre-Saharan area. *Appl. Soil Ecol.* (2007).  
 511 doi:10.1016/j.apsoil.2006.04.009
- 512 22. Li, H. *et al.* Shift in soil microbial communities with shrub encroachment in Inner  
 513 Mongolia grasslands, China. *Eur. J. Soil Biol.* (2017). doi:10.1016/j.ejsobi.2017.02.004
- 514 23. Liu, L., Gundersen, P., Zhang, T. & Mo, J. Effects of phosphorus addition on soil  
 515 microbial biomass and community composition in three forest types in tropical China.  
 516 *Soil Biol. Biochem.* (2012). doi:10.1016/j.soilbio.2011.08.017
- 517 24. Ma, L., Guo, C., Xin, X., Yuan, S. & Wang, R. Effects of belowground litter addition,  
 518 increased precipitation and clipping on soil carbon and nitrogen mineralization in a  
 519 temperate steppe. *Biogeosciences* (2013). doi:10.5194/bg-10-7361-2013
- 520 25. Merilä, P. *et al.* Soil organic matter quality as a link between microbial community  
 521 structure and vegetation composition along a successional gradient in a boreal forest.  
 522 *Appl. Soil Ecol.* (2010). doi:10.1016/j.apsoil.2010.08.003

26. Monkai, J. *et al.* Natural forests maintain a greater soil microbial diversity than that in rubber plantations in Southwest China. *Agric. Ecosyst. Environ.* (2018). doi:10.1016/j.agee.2018.06.009
27. Schneck, J. *et al.* Microbial community composition shapes enzyme patterns in topsoil and subsoil horizons along a latitudinal transect in Western Siberia. *Soil Biol. Biochem.* (2015). doi:10.1016/j.soilbio.2015.01.016
28. Smyth, C. E., Macey, D. & Trofymow, J. A. Long-term litter decay in Canadian forests and the influence of soil microbial community and soil chemistry. *Soil Biol. Biochem.* (2015). doi:10.1016/j.soilbio.2014.09.027
29. Sun, D. *et al.* Effects of experimental warming on soil microbial communities in two contrasting subalpine forest ecosystems, eastern Tibetan Plateau, China. *J. Mt. Sci.* (2016). doi:10.1007/s11629-015-3733-1
30. Teurlinckx, S., Heijboer, A., Veraart, A. J., Kowalchuk, G. A. & Steven, S. A. Local functioning, landscape structuring: Drivers of soil microbial community structure and function in peatlands. *Front. Microbiol.* (2018). doi:10.3389/fmicb.2018.02060
31. Wang, M., Xue, J., Horswell, J., Kimberley, M. O. & Huang, Z. Long-term biosolids application alters the composition of soil microbial groups and nutrient status in a pine plantation. *Biol. Fertil. Soils* **53**, 799–809 (2017).
32. Wei, Y., Cao, W., Li, J., Zhang, A. & Li, X. Phospholipid fatty acid (PLFA) analysis of soil microbial community structure with different intensities of grazing and fencing in alpine shrubland. *Shengtai Xuebao/ Acta Ecol. Sin.* (2018). doi:10.5846/stxb201706301182
33. Whitaker, J. *et al.* Microbial community composition explains soil respiration responses to changing carbon inputs along an Andes-to-Amazon elevation gradient. *J. Ecol.* **102**, 1058–1071 (2014).

- 548 34. Xiao, L., Liu, G. Bin & Xue, S. Effects of vegetational type and soil depth on soil  
549 microbial communities on the Loess Plateau of China. *Arch. Agron. Soil Sci.* (2016).  
550 doi:10.1080/03650340.2016.1170811
- 551 35. Xu, G. *et al.* Labile, recalcitrant, microbial carbon and nitrogen and the microbial  
552 community composition at two *Abies faxoniana* forest elevations under elevated  
553 temperatures. *Soil Biol. Biochem.* (2015). doi:10.1016/j.soilbio.2015.08.016
- 554 36. Xu, Z. *et al.* The variations in soil microbial communities, enzyme activities and their  
555 relationships with soil organic matter decomposition along the northern slope of  
556 Changbai Mountain. *Appl. Soil Ecol.* (2014). doi:10.1016/j.apsoil.2014.09.015
- 557 37. Yang, Y., Geng, Y., Zhou, H., Zhao, G. & Wang, L. Effects of gaps in the forest  
558 canopy on soil microbial communities and enzyme activity in a Chinese pine forest.  
559 *Pedobiologia (Jena)*. (2017). doi:10.1016/j.pedobi.2017.03.001
- 560 38. Yokobe, T., Hyodo, F. & Tokuchi, N. Seasonal effects on microbial community  
561 structure and nitrogen dynamics in temperate forest soil. *Forests* (2018).  
562 doi:10.3390/f9030153
- 563 39. Zhang, X., Wang, W., Chen, W., Zhang, N. & Zeng, H. Comparison of seasonal soil  
564 microbial process in snow-covered temperate ecosystems of northern China. *PLoS One*  
565 (2014). doi:10.1371/journal.pone.0092985
- 566 40. Zhao, Q. *et al.* Altered precipitation seasonality impacts the dominant fungal but rare  
567 bacterial taxa in subtropical forest soils. *Biol. Fertil. Soils* (2017). doi:10.1007/s00374-  
568 016-1171-z
- 569 41. Zhou, Y., Clark, M., Su, J. & Xiao, C. Litter decomposition and soil microbial  
570 community composition in three Korean pine (*Pinus koraiensis*) forests along an  
571 altitudinal gradient. *Plant Soil* (2014). doi:10.1007/s11104-014-2254-y
- 572 42. Ananyeva, N. D., Castaldi, S., Stolnikova, E. V., Kudeyarov, V. N. & Valentini, R.

- 573 Fungi-to-bacteria ratio in soils of European Russia. *Arch. Agron. Soil Sci.* (2015).  
 574 doi:10.1080/03650340.2014.940916
- 575 43. Chen, Y. L. *et al.* Patterns and drivers of soil microbial communities in Tibetan alpine  
 576 and global terrestrial ecosystems. *J. Biogeogr.* (2016). doi:10.1111/jbi.12806
- 577 44. Bischoff, N. *et al.* Land-use change under different climatic conditions: Consequences  
 578 for organic matter and microbial communities in Siberian steppe soils. *Agric. Ecosyst.*  
 579 *Environ.* (2016). doi:10.1016/j.agee.2016.10.022
- 580 45. Chang, E. H., Chen, T. H., Tian, G. L., Hsu, C. K. & Chiu, C. Y. Effect of 40 and 80  
 581 years of conifer regrowth on soil microbial activities and community structure in  
 582 subtropical low mountain forests. *Forests* (2016). doi:10.3390/f7100244
- 583 46. Chang, E. H., Tian, G. & Chiu, C. Y. Soil microbial communities in natural and  
 584 managed cloud montane forests. *Forests* (2017). doi:10.3390/f8010033
- 585 47. Chen, Y. *et al.* Large amounts of easily decomposable carbon stored in subtropical  
 586 forest subsoil are associated with r-strategy-dominated soil microbes. *Soil Biol.*  
 587 *Biochem.* (2016). doi:10.1016/j.soilbio.2016.01.004
- 588 48. Cheng, S., Fang, H. & Yu, G. Threshold responses of soil organic carbon concentration  
 589 and composition to multi-level nitrogen addition in a temperate needle-broadleaved  
 590 forest. *Biogeochemistry* (2018). doi:10.1007/s10533-017-0412-z
- 591 49. Demoling, F., Ola Nilsson, L. & Bååth, E. Bacterial and fungal response to nitrogen  
 592 fertilization in three coniferous forest soils. *Soil Biol. Biochem.* (2008).  
 593 doi:10.1016/j.soilbio.2007.08.019
- 594 50. Ebersberger, D., Wermbter, N., Niklaus, P. A. & Kandeler, E. Effects of long term  
 595 CO<sub>2</sub> enrichment on microbial community structure in calcareous grassland. *Plant Soil*  
 596 (2004). doi:10.1023/B:PLSO.00000047768.89268.8c
- 597 51. Grayston, S. J. & Rennenberg, H. Assessing effects of forest management on microbial

- community structure in a central European beech forest. *Can. J. For. Res.* (2006).  
doi:10.1139/X06-154
52. Hoogmoed, M., Cunningham, S. C., Baker, P. J., Beringer, J. & Cavagnaro, T. R. Effects of wetting frequency and afforestation on carbon, nitrogen and the microbial community in soil. *Agric. Ecosyst. Environ.* (2016). doi:10.1016/j.agee.2016.06.024
53. Huang, X. *et al.* Changes of soil microbial biomass carbon and community composition through mixing nitrogen-fixing species with Eucalyptus urophylla in subtropical China. *Soil Biol. Biochem.* (2014). doi:10.1016/j.soilbio.2014.01.021
54. Huygens, D. *et al.* Microbial nitrogen dynamics in south central Chilean agricultural and forest ecosystems located on an Andisol. *Nutr. Cycl. Agroecosystems* (2011). doi:10.1007/s10705-010-9386-0
55. Jangid, K. *et al.* Land-use history has a stronger impact on soil microbial community composition than aboveground vegetation and soil properties. *Soil Biol. Biochem.* **43**, 2184–2193 (2011).
56. Jangid, K. *et al.* Development of soil microbial communities during tallgrass prairie restoration. *Soil Biol. Biochem.* (2010). doi:10.1016/j.soilbio.2009.11.008
57. The Microbial Community of Three Mountains Pingding, Changbai and Saihanwula Based on the Analysis of Phospholipid Fatty Acids(PLFAs). *Ecology and Environmental Sciences* (2014).
58. Liu, L. *et al.* Interactive Effects of Nitrogen and Phosphorus on Soil Microbial Communities in a Tropical Forest. *PLoS One* (2013). doi:10.1371/journal.pone.0061188
59. Ma, Z., Zhang, M., Xiao, R., Cui, Y. & Yu, F. Changes in soil microbial biomass and community composition in coastal wetlands affected by restoration projects in a Chinese delta. *Geoderma* (2017). doi:10.1016/j.geoderma.2016.11.037

- 623 60. Richter, A., Schöning, I., Kahl, T., Bauhus, J. & Ruess, L. Regional environmental  
624 conditions shape microbial community structure stronger than local forest management  
625 intensity. *For. Ecol. Manage.* (2018). doi:10.1016/j.foreco.2017.11.027
- 626 61. Romaniuk, R., Costantini, A., Giuffré, L. & Nannipieri, P. Catabolic response and  
627 phospholipid fatty acid profiles as microbial tools to assess soil functioning. *Soil Use*  
628 *Manag.* (2016). doi:10.1111/sum.12293
- 629 62. Royer-Tardif, S., Bradley, R. L. & Parsons, W. F. J. Evidence that plant diversity and  
630 site productivity confer stability to forest floor microbial biomass. *Soil Biol. Biochem.*  
631 (2010). doi:10.1016/j.soilbio.2010.01.018
- 632 63. Stevenson, B. A., Hunter, D. W. F. & Rhodes, P. L. Temporal and seasonal change in  
633 microbial community structure of an undisturbed, disturbed, and carbon-amended  
634 pasture soil. *Soil Biol. Biochem.* (2014). doi:10.1016/j.soilbio.2014.04.010
- 635 64. Wang, Q., He, T., Wang, S. & Liu, L. Carbon input manipulation affects soil  
636 respiration and microbial community composition in a subtropical coniferous forest.  
637 *Agric. For. Meteorol.* (2013). doi:10.1016/j.agrformet.2013.04.021
- 638 65. Wang, C. *et al.* Effects of long-term experimental warming on plant community  
639 properties and soil microbial community composition in an alpine meadow. *Isr. J.*  
640 *Ecol. Evol.* (2017). doi:10.1080/15659801.2017.1281201
- 641 66. Wang, R. *et al.* Sensitivities to nitrogen and water addition vary among microbial  
642 groups within soil aggregates in a semiarid grassland. *Biol. Fertil. Soils* (2017).  
643 doi:10.1007/s00374-016-1165-x
- 644 67. Xu, Z. *et al.* Divergence of dominant factors in soil microbial communities and  
645 functions in forest ecosystems along a climatic gradient. *Biogeosciences* (2018).  
646 doi:10.5194/bg-15-1217-2018
- 647 68. Yang, B., Pang, X., Hu, B., Bao, W. & Tian, G. Does thinning-induced gap size result

- in altered soil microbial community in pine plantation in eastern Tibetan Plateau? *Ecol. Evol.* (2017). doi:10.1002/ece3.2714
69. Yang, S. *et al.* Variations in soil microbial community composition and enzymatic activities in response to increased N deposition and precipitation in Inner Mongolian grassland. *Appl. Soil Ecol.* (2017). doi:10.1016/j.apsoil.2017.06.041
70. Yang, F. *et al.* Spatial heterogeneity of microbial community and enzyme activities in a broad-leaved Korean pine mixed forest. *Eur. J. Soil Biol.* (2018). doi:10.1016/j.ejsobi.2018.07.001
71. Zhao, C. *et al.* Soil microbial community composition and respiration along an experimental precipitation gradient in a semiarid steppe. *Sci. Rep.* (2016). doi:10.1038/srep24317
72. Baer, S. G., Bach, E. M., Meyer, C. K., Du Preez, C. C. & Six, J. Belowground Ecosystem Recovery During Grassland Restoration: South African Highveld Compared to US Tallgrass Prairie. *Ecosystems* **18**, 390–403 (2015).
73. Liang, A. *et al.* Investigations of relationships among aggregate pore structure, microbial biomass, and soil organic carbon in a Mollisol using combined non-destructive measurements and phospholipid fatty acid analysis. *Soil Tillage Res.* (2019). doi:10.1016/j.still.2018.09.003
74. Kou, L. *et al.* Nitrogen additions inhibit nitrification in acidic soils in a subtropical pine plantation: effects of soil pH and compositional shifts in microbial groups. *J. For. Res.* (2019). doi:10.1007/s11676-018-0645-2
75. Li, Q. *et al.* Spatial variation in soil microbial community structure and its relation to plant distribution and local environments following afforestation in central China. *Soil Tillage Res.* (2019). doi:10.1016/j.still.2019.05.015
76. Zhou, J. *et al.* Nitrogen addition affects soil respiration primarily through changes in

- 673 microbial community structure and biomass in a subtropical natural forest. *Forests*  
674 (2019). doi:10.3390/f10050435
- 675 77. Chen, L. *et al.* Differential responses of net n mineralization and nitrification to  
676 throughfall reduction in a castanopsis hystrix plantation in southern china. *For.*  
677 *Ecosyst.* (2019). doi:10.1186/s40663-019-0174-2
- 678 78. Zhang, Q. *et al.* Nitrogen addition accelerates the nitrogen cycle in a young subtropical  
679 Cunninghamia lanceolata (Lamb.) plantation. *Ann. For. Sci.* (2019).  
680 doi:10.1007/s13595-019-0817-z
- 681 79. Liu, D., Huang, Y., Sun, H. & An, S. The restoration age of Robinia pseudoacacia  
682 plantation impacts soil microbial biomass and microbial community structure in the  
683 Loess Plateau. *Catena* (2018). doi:10.1016/j.catena.2018.02.001
- 684 80. Wei, K., Sun, T., Tian, J., Chen, Z. & Chen, L. Soil microbial biomass, phosphatase  
685 and their relationships with phosphorus turnover under mixed inorganic and organic  
686 nitrogen addition in a Larix gmelinii plantation. *For. Ecol. Manage.* (2018).  
687 doi:10.1016/j.foreco.2018.04.035
- 688 81. Yang, M., Yang, D. & Yu, X. Soil microbial communities and enzyme activities in sea-  
689 buckthorn (Hippophae rhamnoides) plantation at different ages. *PLoS One* (2018).  
690 doi:10.1371/journal.pone.0190959
- 691 82. Li, J. *et al.* Response of soil organic carbon fractions, microbial community  
692 composition and carbon mineralization to high-input fertilizer practices under an  
693 intensive agricultural system. *PLoS One* (2018). doi:10.1371/journal.pone.0195144
- 694 83. Kang, H. *et al.* Changes in soil microbial community structure and function after  
695 afforestation depend on species and age: Case study in a subtropical alluvial island. *Sci.*  
696 *Total Environ.* (2018). doi:10.1016/j.scitotenv.2017.12.180
- 697 84. Fan, Y. *et al.* Decreased soil organic P fraction associated with ectomycorrhizal fungal



- 698 activity to meet increased P demand under N application in a subtropical forest  
 699 ecosystem. *Biol. Fertil. Soils* (2018). doi:10.1007/s00374-017-1251-8
- 700 85. Yu, X. *et al.* Effect of soil layer and plant-soil interaction on soil microbial diversity  
 701 and function after canopy gap disturbance. *Forests* (2018). doi:10.3390/f9110680
- 702 86. Liu, D. *et al.* Dynamics of soil nitrogen fractions and their relationship with soil  
 703 microbial communities in two forest species of northern China. *PLoS One* (2018).  
 704 doi:10.1371/journal.pone.0196567
- 705 87. Li, D., Liu, J., Chen, H., Zheng, L. & Wang, K. Soil microbial community responses to  
 706 forage grass cultivation in degraded karst soils, Southwest China. *L. Degrad. Dev.*  
 707 (2018). doi:10.1002/ldr.3188
- 708 88. Liao, H., Zheng, C., Li, J. & Long, J. Dynamics of soil microbial recovery from  
 709 cropland to orchard along a 20-year chronosequence in a degraded karst ecosystem.  
 710 *Sci. Total Environ.* (2018). doi:10.1016/j.scitotenv.2018.05.246
- 711 89. Zhao, Q. *et al.* Spring drying and intensified summer rainfall affected soil microbial  
 712 community composition but not enzyme activity in a subtropical forest. *Appl. Soil*  
 713 *Ecol.* (2018). doi:10.1016/j.apsoil.2018.06.014
- 714 90. Kim, S. *et al.* Tree species and recovery time drives soil restoration after mining: A  
 715 chronosequence study. *L. Degrad. Dev.* (2018). doi:10.1002/ldr.2951
- 716 91. van Leeuwen, J. P. *et al.* Effects of land use on soil microbial biomass, activity and  
 717 community structure at different soil depths in the Danube floodplain. *Eur. J. Soil Biol.*  
 718 (2017). doi:10.1016/j.ejsobi.2017.02.001
- 719 92. Gunina, A., Smith, A. R., Godbold, D. L., Jones, D. L. & Kuzyakov, Y. Response of  
 720 soil microbial community to afforestation with pure and mixed species. *Plant Soil*  
 721 (2017). doi:10.1007/s11104-016-3073-0
- 722 93. Liu, Z., Rong, Q., Zhou, W. & Liang, G. Effects of inorganic and organic amendment

- on soil chemical properties, enzyme activities, microbial community and soil quality in yellow clayey soil. *PLoS One* (2017). doi:10.1371/journal.pone.0172767
94. Fang, X. *et al.* Forest-type shift and subsequent intensive management affected soil organic carbon and microbial community in southeastern China. *Eur. J. For. Res.* (2017). doi:10.1007/s10342-017-1065-0
95. Lupwayi, N. Z., Larney, F. J., Blackshaw, R. E., Kanashiro, D. A. & Pearson, D. C. Phospholipid fatty acid biomarkers show positive soil microbial community responses to conservation soil management of irrigated crop rotations. *Soil Tillage Res.* (2017). doi:10.1016/j.still.2016.12.003
96. Dai, X., Wang, H. & Fu, X. Soil microbial community composition and its role in carbon mineralization in long-term fertilization paddy soils. *Sci. Total Environ.* (2017). doi:10.1016/j.scitotenv.2016.11.212
97. Rathore, A. P., Chaudhary, D. R. & Jha, B. Seasonal Patterns of Microbial Community Structure and Enzyme Activities in Coastal Saline Soils of Perennial Halophytes. *L. Degrad. Dev.* (2017). doi:10.1002/ldr.2710
98. Wang, C. *et al.* The effect of simulated warming on root dynamics and soil microbial community in an alpine meadow of the Qinghai-Tibet Plateau. *Appl. Soil Ecol.* (2017). doi:10.1016/j.apsoil.2017.03.005
99. Zhao, Q. *et al.* Asymmetric effects of litter removal and litter addition on the structure and function of soil microbial communities in a managed pine forest. *Plant Soil* (2017). doi:10.1007/s11104-016-3115-7
100. Sun, S. *et al.* Response of soil microbial community structure to increased precipitation and nitrogen addition in a semiarid meadow steppe. *Eur. J. Soil Sci.* (2017). doi:10.1111/ejss.12441
101. Kotzé, E., Sandhage-Hofmann, A., Amelung, W., Oomen, R. J. & du Preez, C. C. Soil

- 748 microbial communities in different rangeland management systems of a sandy savanna  
749 and clayey grassland ecosystem, South Africa. *Nutr. Cycl. Agroecosystems* (2017).  
750 doi:10.1007/s10705-017-9832-3
- 751 102. Swarzenski, C. M., Song, C., Meng, H., Wang, X. & Tan, W. Nitrogen additions affect  
752 litter quality and soil biochemical properties in a peatland of Northeast China. *Ecol.*  
753 *Eng.* (2017). doi:10.1016/j.ecoleng.2016.12.025
- 754 103. Zhang, J., Li, M. & Zheng, G. Effect of stand age on soil microbial community  
755 structure in wolfberry (*Lycium barbarum* L.) fields. *Shengtai Xuebao/ Acta Ecol. Sin.*  
756 (2017). doi:10.1016/j.chnaes.2016.12.003
- 757 104. Xu, S. *et al.* Comparison of Microbial Community Composition and Diversity in  
758 Native Coastal Wetlands and Wetlands that Have Undergone Long-Term Agricultural  
759 Reclamation. *Wetlands* (2017). doi:10.1007/s13157-016-0843-7
- 760 105. Xiang, Y., Cheng, M., Huang, Y., An, S. & Darboux, F. Changes in soil microbial  
761 community and its effect on carbon sequestration following afforestation on the Loess  
762 Plateau, China. *Int. J. Environ. Res. Public Health* (2017). doi:10.3390/ijerph14080948
- 763 106. Veen, G. F. C. *et al.* Coordinated responses of soil communities to elevation in three  
764 subarctic vegetation types. *Oikos* (2017). doi:10.1111/oik.04158
- 765 107. Faust, S. *et al.* Effect of biodynamic soil amendments on microbial communities in  
766 comparison with inorganic fertilization. *Appl. Soil Ecol.* (2017).  
767 doi:10.1016/j.apsoil.2017.03.006
- 768 108. Qi, L. & Yang, J. Microbial community composition regulates SOC decomposition  
769 response to forest conversion in a Chinese temperate forest. *Ecol. Res.* (2017).  
770 doi:10.1007/s11284-016-1428-x
- 771 109. Chang, E. H., Chen, T. H., Tian, G. & Chiu, C. Y. The effect of altitudinal gradient on  
772 soil microbial community activity and structure in moso bamboo plantations. *Appl. Soil*

- 773 *Ecol.* (2016). doi:10.1016/j.apsoil.2015.10.018
- 774 110. Cavagnaro, T. R., Cunningham, S. C. & Fitzpatrick, S. Pastures to woodlands: Changes  
775 in soil microbial communities and carbon following reforestation. *Appl. Soil Ecol.* **107**,  
776 24–32 (2016).
- 777 111. Guo, X. *et al.* Effects of land use change on the composition of soil microbial  
778 communities in a managed subtropical forest. *For. Ecol. Manage.* (2016).  
779 doi:10.1016/j.foreco.2016.03.048
- 780 112. Jia, S. *et al.* Long-term conservation tillage influences the soil microbial community  
781 and its contribution to soil CO<sub>2</sub> emissions in a Mollisol in Northeast China. *J. Soils*  
782 *Sediments* (2016). doi:10.1007/s11368-015-1158-7
- 783 113. Xiao, L., Liu, G. Bin, Zhang, J. Y. & Xue, S. Long-term effects of vegetational  
784 restoration on soil microbial communities on the Loess Plateau of China. *Restor. Ecol.*  
785 (2016). doi:10.1111/rec.12374
- 786 114. Perkiömäki, J. & Fritze, H. Short and long-term effects of wood ash on the boreal  
787 forest humus microbial community. *Soil Biol. Biochem.* (2002). doi:10.1016/S0038-  
788 0717(02)00079-2
- 789 115. Perkiömäki, J., Tom-Petersen, A., Nybroe, O. & Fritze, H. Boreal forest microbial  
790 community after long-term field exposure to acid and metal pollution and its potential  
791 remediation by using wood ash. *Soil Biol. Biochem.* (2003). doi:10.1016/S0038-  
792 0717(03)00250-5
- 793 116. Niwa, S., Kaneko, N., Okada, H. & Sakamoto, K. Effects of fine-scale simulation of  
794 deer browsing on soil micro-foodweb structure and N mineralization rate in a  
795 temperate forest. *Soil Biol. Biochem.* (2008). doi:10.1016/j.soilbio.2007.10.004
- 796 117. Campbell, C. D., Cameron, C. M., Bastias, B. A., Chen, C. & Cairney, J. W. G. Long  
797 term repeated burning in a wet sclerophyll forest reduces fungal and bacterial biomass

798 and responses to carbon substrates. *Soil Biol. Biochem.* (2008).  
799 doi:10.1016/j.soilbio.2008.04.020

800 118. Unger, I. M., Kennedy, A. C. & Muzika, R. M. Flooding effects on soil microbial  
801 communities. *Appl. Soil Ecol.* (2009). doi:10.1016/j.apsoil.2009.01.007

802 119. Zhang, Q. *et al.* Alterations in soil microbial community composition and biomass  
803 following agricultural land use change. *Sci. Rep.* (2016). doi:10.1038/srep36587

804 120. Deng, Q. *et al.* Soil microbial community and its interaction with soil carbon and  
805 nitrogen dynamics following afforestation in central China. *Sci. Total Environ.* (2016).  
806 doi:10.1016/j.scitotenv.2015.09.080

807 121. Wang, C. *et al.* Responses of soil microbial community to continuous experimental  
808 nitrogen additions for 13 years in a nitrogen-rich tropical forest. *Soil Biol. Biochem.*  
809 (2018). doi:10.1016/j.soilbio.2018.03.009

810 122. Zheng, S. *et al.* Effect of nitrogen and acid deposition on soil respiration in a temperate  
811 forest in China. *Geoderma* (2018). doi:10.1016/j.geoderma.2018.05.022

812 123. Wang, J. *et al.* Conversion of rainforest into agroforestry and monoculture plantation in  
813 China: Consequences for soil phosphorus forms and microbial community. *Sci. Total*  
814 *Environ.* (2017). doi:10.1016/j.scitotenv.2017.04.012

815 124. Bastida, F. *et al.* Differential sensitivity of total and active soil microbial communities  
816 to drought and forest management. *Glob. Chang. Biol.* (2017). doi:10.1111/gcb.13790

817 125. Buyer, J. S., Baligar, V. C., He, Z. & Arévalo-Gardini, E. Soil microbial communities  
818 under cacao agroforestry and cover crop systems in Peru. *Appl. Soil Ecol.* (2017).  
819 doi:10.1016/j.apsoil.2017.09.009

820 126. Borymski, S., Cycon, M., Beckmann, M., Mur, L. A. J. & Piotrowska-Seget, Z. Plant  
821 species and heavy metals affect biodiversity of microbial communities associated with  
822 metal-tolerant plants in metalliferous soils. *Front. Microbiol.* (2018).

- doi:10.3389/fmicb.2018.01425
127. Montiel-Rozas, M. M. *et al.* Long-term effects of organic amendments on bacterial and fungal communities in a degraded Mediterranean soil. *Geoderma* (2018). doi:10.1016/j.geoderma.2018.06.022
128. Huang, J. *et al.* Effects of phosphorus addition on soil microbial biomass and community composition in a subalpine spruce plantation. *Eur. J. Soil Biol.* (2016). doi:10.1016/j.ejsobi.2015.12.007
129. Chen, L. *et al.* Regulation of priming effect by soil organic matter stability over a broad geographic scale. *Nat. Commun.* (2019). doi:10.1038/s41467-019-13119-z
130. Zhang, C. *et al.* Soil microbial communities response to herbicide 2,4-dichlorophenoxyacetic acid butyl ester. *Eur. J. Soil Biol.* (2010). doi:10.1016/j.ejsobi.2009.12.005
131. Bezemer, T. M. *et al.* Plant species and functional group effects on abiotic and microbial soil properties and plant-soil feedback responses in two grasslands. *J. Ecol.* (2006). doi:10.1111/j.1365-2745.2006.01158.x
132. Bi, J., Zhang, N., Liang, Y., Yang, H. & Ma, K. Interactive effects of water and nitrogen addition on soil microbial communities in a semiarid steppe. *J. Plant Ecol.* (2012). doi:10.1093/jpe/rtr046
133. Chen, D. *et al.* Effects of plant functional group loss on soil biota and net ecosystem exchange: A plant removal experiment in the Mongolian grassland. *J. Ecol.* (2016). doi:10.1111/1365-2745.12541
134. Högberg, M. N., Högberg, P. & Myrold, D. D. Is microbial community composition in boreal forest soils determined by pH, C-to-N ratio, the trees, or all three? *Oecologia* (2007). doi:10.1007/s00442-006-0562-5
135. Niu, L., Liu, Y. H., Li, Y. & Ouyang, S. N. Microbial community structure of the

- 848 alpine meadow under different grazing styles in Naqu prefecture of Tibet. *Chinese J.*  
849 *Appl. Ecol.* (2015).
- 850 136. Qin, H. *et al.* Rapid soil fungal community response to intensive management in a  
851 bamboo forest developed from rice paddies. *Soil Biol. Biochem.* (2014).  
852 doi:10.1016/j.soilbio.2013.09.031
- 853 137. Yan, H., Huang, Y., Jiang, Y. & Zhao, T. Seasonal variation of PLFA during soil  
854 mineralization under two kinds of shrub lands in mountainous area of southern  
855 Ningxia, Northwest China. *Huanjing Kexue Xuebao/Acta Sci. Circumstantiae* (2014).  
856 doi:10.13671/j.hjkxxb.2014.0538
- 857 138. Yang, Q. *et al.* Structure and function of soil microbial community in artificially  
858 planted *Sonneratia apetala* and *S. caseolaris* forests at different stand ages in Shenzhen  
859 Bay, China. *Mar. Pollut. Bull.* (2014). doi:10.1016/j.marpolbul.2014.02.024
- 860 139. Hu, Y. *et al.* Soil organic carbon and soil structure are driving microbial abundance and  
861 community composition across the arid and semi-arid grasslands in northern China.  
862 *Soil Biol. Biochem.* (2014). doi:10.1016/j.soilbio.2014.06.014
- 863 140. Ma, L., Guo, C., Lü, X., Yuan, S. & Wang, R. Do climate factors govern soil microbial  
864 community composition and biomass at a regional scale? *Biogeosciences Discussions*  
865 (2014). doi:10.5194/bgd-11-17729-2014
- 866 141. Frey, B., Stemmer, M., Widmer, F., Luster, J. & Sperisen, C. Microbial activity and  
867 community structure of a soil after heavy metal contamination in a model forest  
868 ecosystem. *Soil Biol. Biochem.* (2006). doi:10.1016/j.soilbio.2005.11.032
- 869 142. Jiang, Y., Sun, B., Jin, C. & Wang, F. Soil aggregate stratification of nematodes and  
870 microbial communities affects the metabolic quotient in an acid soil. *Soil Biol.*  
871 *Biochem.* (2013). doi:10.1016/j.soilbio.2013.01.006
- 872 143. Joner, E. J., Eldhuset, T. D., Lange, H. & Frostegård, Å. Changes in the microbial

community in a forest soil amended with aluminium in situ. in *Plant and Soil* (2005).  
doi:10.1007/s11104-005-2287-3

144. Li, Q. *et al.* Nitrogen Addition and Warming Independently Influence the Belowground  
Micro-Food Web in a Temperate Steppe. *PLoS One* (2013).  
doi:10.1371/journal.pone.0060441

145. Mitchell, R. J., Campbell, C. D., Chapman, S. J. & Cameron, C. M. The ecological  
engineering impact of a single tree species on the soil microbial community. *J. Ecol.*  
(2010). doi:10.1111/j.1365-2745.2009.01601.x

146. Potthoff, M. *et al.* Soil microbial community composition as affected by restoration  
practices in California grassland. *Soil Biol. Biochem.* (2006).  
doi:10.1016/j.soilbio.2005.12.009

147. Shanmugam, S. G. & Kingery, W. L. Changes in soil microbial community structure in  
relation to plant succession and soil properties during 4000 years of pedogenesis. *Eur.*  
*J. Soil Biol.* (2018). doi:10.1016/j.ejsobi.2018.07.003

148. Xu, M. *et al.* Soil microbial community structure and activity along a montane  
elevational gradient on the Tibetan Plateau. *Eur. J. Soil Biol.* (2014).  
doi:10.1016/j.ejsobi.2014.06.002

149. Waldrop, M. P. *et al.* The interacting roles of climate, soils, and plant production on  
soil microbial communities at a continental scale. *Ecology* (2017).  
doi:10.1002/ecy.1883

150. Ma, et al. Plants regulate the effects of experimental warming on the soil microbial  
community in an alpine scrub ecosystem. *PLoS One*, 13, e0195079 (2018).

151. Xu. Influence of elevation and land use on soil organic carbon and microbial  
community on Southeast Tibetan Plateau. PhD Dissertation, China Agricultural



University, (2016).

152. Zhu. Study on the effects of microorganisms on phosphorus transformation in the  
rhizosphere of wetland plants. Masters Dissertation, Beijing Forestry University,  
(2016).
153. Zhao, et al. Changes in soil microbial community, enzyme activities and organic matter  
fractions under long-term straw return in north-central China. *Agriculture, Ecosystems  
& Environment*, 216, 82-88 (2016).
154. Wu, et al. The Effect of Forest Thinning on Soil Microbial Community Structure and  
Function. *Forests*, 10, 352 (2019).
155. Si, et al. Changes in soil microbial community composition and organic carbon  
fractions in an integrated ricecrayfish farming system in subtropical China. *Scientific  
Reports*, 7, 2856 (2017).
156. Peltoniemi, et al. Microbial ecology in a future climate: effects of temperature and  
moisture on microbial communities of two boreal fens. *Fems Microbiology Ecology*, 7,  
54-61 (2015).
157. Jing. The spatial heterogeneity of soil microorganism and organic matter in broad-  
leaved korean pine forest in Changbai mountain. Masters Dissertation, Shanxi  
University, (2016).
158. Huang, et al. Effects of phosphorus addition on soil microbial biomass and community  
composition in a subalpine spruce plantation. *European Journal of Soil Biology*, 72,  
35-41 (2016).
159. Yu, et al. Effect of monospecific and mixed seabuckthorn (*Hippophae rhamnoides*)  
plantations on the structure and activity of soil microbial communities. *PLoS One*,  
10, e0117505 (2015).

- 923
- 924 160. Zhang Responses of soil microbial communities to typical artificial plantations with  
 925 different ages in a loess area. Masters Dissertation, Northwest A & F University,  
 926 (2017).
- 927 161. Zang et al. Effects of grazing on microbial community structure diversity in  
 928 rhizosphere soil of *Artemisia frigida*. *Acta Agrestia Sinica*, 25, 982-992 (2017).
- 929 162. Yang et al. Comparison of soil microbial communitiy composition and structure in  
 930 *Tricholoma matsutake* shiro and non-shiro soils in *Quercus semecarpifolia* and *Pinus*  
 931 *densata* forests. *Acta Ecologica Sinica*, 38, 1630-1638 (2018).
- 932 163. Wu. The research on soil nutrition and relationship with the composition of the  
 933 microbial communities in different forests of Changbai mountain. Masters Dissertation,  
 934 Northeast Forestry University, (2012).
- 935 164. Sun. Interactions of water and nitrogen addition on soil microbial community  
 936 composition and functional diversity depending on the inter-annual precipitation in a  
 937 Chinese steppe. *Journal of Integrative Agriculture*, 14, 788-799 (2015).
- 938 165. Wang et al. Soil microbial community composition rather than litter quality is linked  
 939 with soil organic carbon chemical composition in plantations in subtropical China.  
 940 *Journal of Soils Sediments*, 15, 1094-1103 (2015).
- 941 166. Pan. Soil carbon and nitrogen transfromation process research of relationship between  
 942 soil microbial community sturcture of *Michelia maclurei*, *Pinus massoniana* plantation  
 943 Masters Dissertation, Guangxi University, (2015).
- 944 167. Qin et al. Effects of wetland vegetation on soil microbial composition: a case study in  
 945 Tumen river basin, Northeast China. *Chinese Geographical Science*, 27, 239-247  
 946 (2017).
- 947 168. Huang. Soil microbial indices response to vegetation natural rehabilitation on the loess

948 hilly-gully area. PhD Dissertation, Northwest A & F University, (2008).

949

950 169. Brant et al. Microbial community utilization of added carbon substrates in response to

951 long-term carbon input manipulation. *Soil Biology & Biochemistry*, 38, 2219-2232

952 (2006).

953 170. Chang. The study of microbial community diversity and function along glacier

954 foreland in Ny-Alesund, Arctic. PhD Dissertation, Wuhan University, (2016).

955 171. Chen et al. Microbial community structure of three typical gymnosperms soil in scenic

956 area of Maijishan, Gansu Province. *Microbiology China*, 43, 1939-1944 (2016).

957 172. Chi et al. Research on soil microbial community structure of different forest-wetland

958 ecotones in Xiaoxing'an Mountain. *Forest Engineering*, 3, 6-13 (2018).

959 173. Gu et al. Soil microbial community structure, enzyme activities, and their influencing

960 factors along different altitudes of Changbai Mountain. *Acta Ecologica Sinica*, 37,

961 8347-8384 (2017).

962 174. Li et al. Effects of nitrogen and phosphorus addition on soil microbial community in a

963 secondary tropical forest of China. *Biology & Fertility of Soils*, 51, 207-215 (2015).

964 175. Liu et al. Soil microbial community structure and functional diversity marked by PLFA

965 in forestland. Masters Dissertation, Beijing Forestry University, (2016).

966 176. Liu et al. Effect of different land use types on soil aggregates microbial biomass and

967 community composition in the loess hilly region of west Henan. *Pratacultural Science*,

968 35, 771-780 (2018).

969 177. Lu et al. Soil labile organic carbon and nitrogen pools and associated microbial process

970 under three forest types in Australia. PhD Dissertation, Jiangxi Agricultural University,

971 (2011).

972 178. Luo et al. Characteristics of carbon and nitrogen in monoculture and mixed young

- stands of *Erythrophleum fordii* and *Pinus massoniana* in southern subtropical China.  
PhD Dissertation, Chinese Academy of Forestry, (2014).
179. Wu et al. Effects of precipitation change on soil microbial community of the monsoon  
evergreen leaved forest in Dinghushan biosphere reserve. Masters Dissertation,  
Guangzhou University, (2017).
